# Supplementary material for: Retinal Injury Activates Complement Expression in Müller Cells Leading to Neuroinflammation and Photoreceptor Cell Death
Source: MDPI journal article supplement (doi:10.3390/cells12131754), 2023-06-30
Supplement: s1 [file s1]

## Supplementary figures

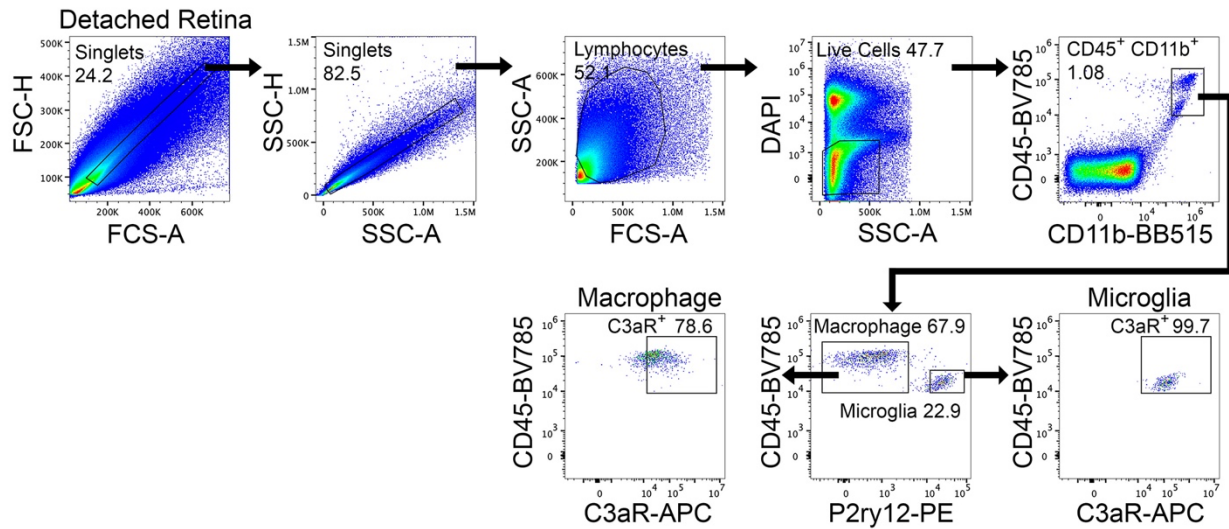

**Supplementary figure S1:** Flow cytometry data showing gating strategy and quality control. Representative flow cytometric analysis of detached retina showing the gating strategy to identify microglia (CD45<sup>mid</sup> CD11b<sup>+</sup> P2ry12<sup>+</sup>) and macrophage (CD45<sup>high</sup> CD11b<sup>+</sup> P2ry12<sup>-</sup>) population. Microglial and macrophage populations were further gated to determine C3aR expression.

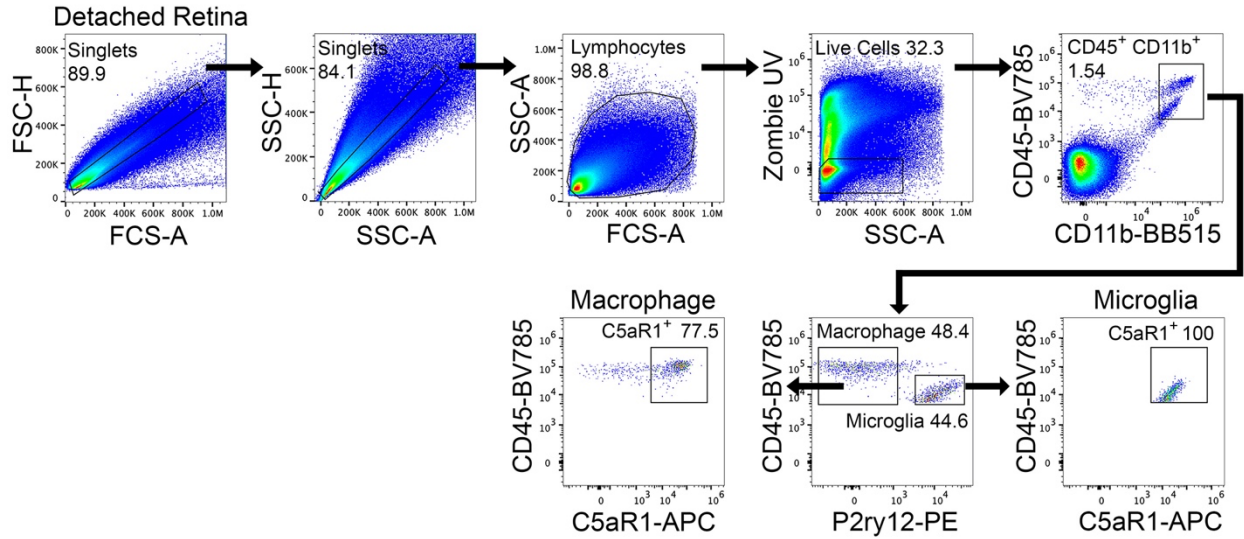

**Supplementary figure S2:** Flow cytometry data showing gating strategy and quality control. Representative flow cytometric analysis of detached retina showing the gating strategy to identify microglia (CD45<sup>mid</sup> CD11b<sup>+</sup> P2ry12<sup>+</sup>) and macrophage (CD45<sup>high</sup> CD11b<sup>+</sup> P2ry12<sup>-</sup>) population. Microglial and macrophage populations were further gated to determine C5aR1 expression.
